# Supplementary material
Source: PubMed Central journal article supplement (PMC4301431)
Supplement: NIHMS419585-supplement-1_si_001.pdf [file NIHMS419585-supplement-1_si_001.pdf]

Structural and Kinetic Effects on Changes in the CO<sub>2</sub> Binding Pocket of  
Human Carbonic Anhydrase II

Dayne West<sup>1,2</sup>, Chae Un Kim<sup>3</sup>, Chingkuang Tu<sup>2</sup>, Jim Gordon<sup>1</sup>, Arthur H. Robbins<sup>1</sup>, Sol M.  
Gruner<sup>3,4</sup>, David N. Silverman<sup>2,\*</sup>, and Robert McKenna<sup>1,\* †</sup>

<sup>1</sup>Department of Biochemistry and Molecular Biology, <sup>2</sup>Department of Pharmacology and  
Therapeutics, University of Florida, Gainesville, FL 32610, and Cornell High Energy  
Synchrotron Source (CHESS)<sup>3</sup>, Physics Department<sup>4</sup>, Cornell University, Ithaca, NY 14853,  
USA.

Figure S1

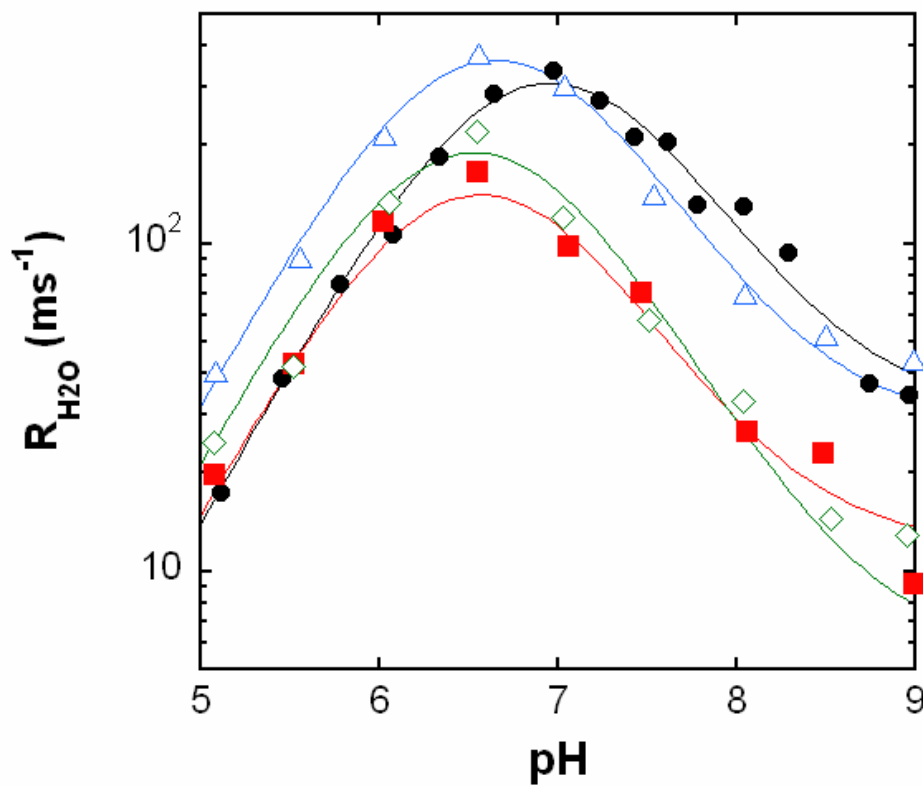

**Figure S1.** pH profiles of  $R_{\text{H}_2\text{O}}/[\text{E}]$  ( $\text{s}^{-1}$ ) for the hydration of  $\text{CO}_2$  catalyzed by the following variants of HCA II: wild type (black, ●); V143A (blue, Δ); V143I (red, ■); and V143L (green, ◇). Data were obtained from rates of depletion of  $^{18}\text{O}$  from  $\text{CO}_2$  measured by membrane inlet mass spectrometry at 25 °C in solutions containing 25 mM  $^{18}\text{O}$ -enriched  $\text{CO}_2$ /bicarbonate. No buffers were added.
